1 Research Article  
2 Discoveries section

3  
4 Title: Genome-wide misexpression associated with hybrid sterility in *Mimulus* (monkeyflower)

5  
6 Authors: Rachel E. Kerwin<sup>1,2</sup> and Andrea L. Sweigart<sup>1,\*</sup>

7  
8 Author affiliations:

9 <sup>1</sup> Department of Genetics, University of Georgia, Athens, GA 30602

10 <sup>2</sup> Department of Biochemistry and Molecular Biology, Michigan State University, East Lansing, MI  
11 48824

12 \* Corresponding author email: [sweigart@uga.edu](mailto:sweigart@uga.edu)

13  
14 Running title: Molecular mechanisms of hybrid incompatibility in monkeyflower

15  
16 Keywords: monkeyflower, *Mimulus*, allele-specific expression, regulatory divergence, hybrid  
17 incompatibility, hybrid sterility

18 **ABSTRACT**

19 Divergence in gene expression regulation is common between closely related species and may give  
20 rise to incompatibilities in their hybrid progeny. In this study, we investigated the relationship  
21 between regulatory evolution within species and reproductive isolation between species. We focused  
22 on a well-studied case of hybrid sterility between *Mimulus guttatus* and *M. nasutus*, two closely  
23 related yellow monkeyflower species, that is caused by two epistatic loci, *hybrid male sterility 1*  
24 (*hms1*) and *hybrid male sterility 2* (*hms2*). We quantified and compared global transcript abundance  
25 across male and female reproductive tissues (*i.e.* stamens and carpels) of *M. guttatus* and *M. nasutus*,  
26 as well as sterile and fertile progeny from an advanced *M. nasutus*-*M. guttatus* introgression line that  
27 carries the *hms1*-*hms2* incompatibility. We observed substantial variation in transcript abundance  
28 between *M. guttatus* and *M. nasutus*, including distinct but overlapping patterns of tissue-biased  
29 expression, providing evidence for regulatory divergence between these species. Furthermore, we  
30 found pervasive genome-wide misexpression exclusively associated with hybrid sterility – only  
31 observed in the affected tissues (*i.e.* stamens) of sterile introgression hybrids. Examining patterns of  
32 allele-specific expression in sterile and fertile hybrids, we found evidence of *cis*- and *trans*-  
33 regulatory divergence, as well as *cis-trans* compensatory evolution (likely to be driven by stabilizing  
34 selection). However, regulatory divergence does not appear to cause misexpression in sterile hybrids,  
35 which instead likely manifests as a downstream consequence of sterility itself.

36

## 37 INTRODUCTION

38 Closely related species often show considerable regulatory divergence – that is, they have  
39 accumulated differences in the *cis*-acting DNA sequences or *trans*-acting factors that regulate gene  
40 expression (Tautz, 2000; Wray *et al.*, 2003). As with any epistatic loci, divergence in interacting  
41 regulatory elements might lead to incompatibilities in the hybrid progeny of interspecific crosses  
42 (Dobzhansky, 1937; Muller, 1942; Mack & Nachman, 2017). These hybrid incompatibilities might  
43 arise due to independent substitutions in distinct lineages, with genetic drift or selection increasing  
44 the frequency of a derived allele at a *cis*-acting locus in one species and a *trans*-acting partner locus  
45 in the other. In the classic Dobzhansky-Muller Model, these derived alleles are neutral or favored on  
46 their own, but cause aberrant gene expression when combined in hybrids. Alternatively, hybrid  
47 incompatibilities might arise because of coevolution between *cis*- and *trans*-elements within a single  
48 lineage. Stabilizing selection to maintain optimal levels of transcription, which favors *cis*- and *trans*-  
49 regulatory variants that compensate for each other, appears to be an important force shaping gene  
50 expression evolution (Gilad *et al.*, 2006; Tirosch *et al.*, 2009; Goncalves *et al.*, 2012; Coolon *et al.*,  
51 2014; Mack *et al.*, 2016). Thus, even when transcript abundance for a particular gene does not differ  
52 between species, the underlying regulatory components controlling its expression might have  
53 diverged (Tautz, 2000; True & Haag, 2001; Wray *et al.*, 2003). This process of compensatory  
54 evolution in gene regulatory networks, which is likely to affect different sets of genes in diverging  
55 lineages, has been proposed as a major source of hybrid incompatibilities between species (Landry  
56 *et al.*, 2005; Takahasi *et al.*, 2011).

57 Despite the clear importance of changes in gene expression for phenotypic evolution  
58 (Wittkopp, 2013), empirical support for regulatory divergence as a general driver of hybrid  
59 incompatibilities is mixed. While many studies have uncovered pervasive gene misexpression in  
60 sterile hybrids (Michalak & Noor, 2003; Ranz *et al.*, 2004; Haerty & Singh, 2006; Malone *et al.*,  
61 2007; Coolon *et al.*, 2014; Brill *et al.*, 2016; Mack *et al.*, 2016), others have found no association  
62 between patterns of gene expression and hybrid dysfunction (Barbash & Lorigan, 2007; Wei *et al.*,  
63 2014; Guerrero *et al.*, 2016). Even when sterile or inviable hybrids do show misexpression, it is  
64 usually difficult to determine which is cause and which is effect. Because hybrid dysfunction often  
65 involves gross defects in affected tissues (e.g., testes in male sterile hybrids), global gene  
66 misregulation might occur as a downstream consequence of abnormal or missing cell types. For  
67 example, although misexpression increases dramatically in hybrids between *Drosophila* species pairs  
68 with longer divergence times (Coolon *et al.*, 2014), so does the severity of hybrid dysfunction.

69 A promising approach to disentangle the causes of hybrid incompatibilities from their  
70 downstream effects is to examine interspecific gene expression variation associated with particular  
71 genomic regions. Although most studies of regulatory divergence compare gene expression profiles  
72 between parental species and F1 hybrids, a handful have used introgression lines (Lemos *et al.*, 2008;  
73 Meiklejohn *et al.*, 2014; Guerrero *et al.*, 2016) or recombinant mapping populations (Turner *et al.*,  
74 2014), which can facilitate investigations into whether gene regulation and hybrid dysfunction have a  
75 shared genetic basis. With the introgression approach, it is possible to examine the regulatory effects  
76 of small genomic regions from one species on the genetic background of another species, and vice  
77 versa. Additionally, comparing the regulatory effects of introgressions with and without hybrid  
78 incompatibility phenotypes can address the generality of misregulation as a cause of hybrid  
79 dysfunction (Guerrero *et al.*, 2016).

80 To investigate the link between regulatory divergence and hybrid dysfunction, we exploited a  
81 well-studied hybrid incompatibility system between two closely related species of monkeyflower  
82 (*Mimulus*). Previously, we discovered severe male sterility and partial female sterility in hybrids  
83 between *Mimulus guttatus* (IM62 inbred line) and *M. nasutus* (SF5 inbred line) (Sweigart *et al.*,  
84 2006) and fine-mapped the effects to two small nuclear genomic regions of ~60 kb each on  
85 chromosomes 6 and 13 (Sweigart & Flagel, 2015). Hybrids that carry at least one incompatible *M.*  
86 *guttatus* IM62 allele at *hybrid male sterility 1* (*hms1*) on chromosome 6 in combination with two  
87 incompatible *M. nasutus* SF5 alleles at *hybrid male sterility 2* (*hms2*) on chromosome 13 display  
88 nearly complete (>90%) pollen sterility, whereas other allelic combinations are highly fertile  
89 (Sweigart *et al.*, 2006; Kerwin & Sweigart, 2017). Here, we took advantage of SF5-IM62  
90 introgression hybrids, formed through multiple rounds of selection for pollen sterility and  
91 backcrossing (as the female parent) to *M. nasutus* SF5 (Figure 1). This recurrent selection with  
92 backcrossing (RSB) population maintains a heterozygous IM62 introgression on chromosome 6 (that  
93 contains the *hms1* locus) against an otherwise SF5 genetic background (including at *hms2*). Each  
94 generation, RSB progeny segregate ~1:1 for sterility to fertility, depending on whether they inherit a  
95 copy of the incompatible IM62 *hms1* allele. Additionally, nearly all RSB hybrids are expected to  
96 carry a heterozygous IM62 introgression on chromosome 11 surrounding the female meiotic drive  
97 locus *D*, which is transmitted to >98% of progeny when an SF5-IM62 F1 hybrid acts as the maternal  
98 parent (Fishman & Willis, 2005). Thus, this crossing scheme produces two classes of progeny: sterile  
99 (STE) individuals that carry two heterozygous introgressions (on chromosome 6 with *hms1* and on  
100 chromosome 11 with *D*) and fertile (FER) individuals that carry a single introgression (on

101 chromosome 11 with *D*). The result is an internally controlled genetic experiment that is ideally  
102 suited for determining whether gene misexpression is a cause or consequence of hybrid sterility.

103 For this study, we sequenced the transcriptomes of STE and FER progeny from a seventh-  
104 generation RSB population, (*i.e.* RSB<sub>7</sub>) alongside their parents, *M. guttatus* IM62 and *M. nasutus*  
105 SF5. Because the *hms1-hms2* incompatibility affects both male and female fertility (Sweigart *et al.*,  
106 2006), we isolated RNA separately from developing stamen and carpel tissue. This RNAseq dataset  
107 allowed us to identify changes in gene expression due to the presence of a genomic segment that  
108 includes a known hybrid sterility allele (*i.e.*, the IM62 allele at *hms1*) versus a genomic segment that  
109 does not (*i.e.*, the IM62 allele at *D*). If regulatory divergence between *Mimulus* species is substantial,  
110 we would expect to see expression differences induced by both introgressions. In particular, the  
111 introgression lines might show transgressive expression – genes expressed outside of the parental  
112 range – due to heterospecific combinations of divergent *cis*- and *trans*-acting factors. If instead,  
113 transcriptional misregulation is confined to sterile hybrid samples, it might suggest modest regulatory  
114 divergence between species and large downstream effects of the *hms1-hms2* incompatibility. With  
115 this RNAseq dataset, we addressed the following specific questions. To what extent does gene  
116 expression vary between closely related *Mimulus* species? Is there evidence for tissue-biased gene  
117 expression between the stamens and carpels? What are the mechanisms of regulatory divergence  
118 between species? Is there an association between transcriptional misregulation and hybrid sterility  
119 and, if so, what is its cause? Do expression patterns narrow down the list of candidate genes for *hms1*  
120 or *hms2*? Our results provide insight into regulatory divergence between closely related species and  
121 the consequences for reproductive isolation.

122

## 123 RESULTS

124 To examine patterns of genome-wide expression associated with the *hms1-hms2* hybrid  
125 incompatibility in *Mimulus*, we performed transcriptome sequencing (RNAseq) of stamens and  
126 carpels from *M. guttatus* IM62 and *M. nasutus* SF5, as well as from fertile (FER) and sterile (STE)  
127 siblings of an advanced (seventh generation) SF5 x IM62 introgression population called *recurrent*  
128 *selection with backcrossing* (RSB<sub>7</sub>) (Figure 1; see Methods for more details on crossing scheme). We  
129 obtained an average of 14.1 million (range: 10.9 - 16.8 million) 50-bp single-end sequencing reads  
130 from each sample (Table S1). After initial pre-processing, we aligned trimmed reads to either the *M.*  
131 *guttatus* v2.0 reference genome (<http://phytozome.net>) or a pseudoreference SF5 genome generated  
132 for this study (see Methods for details). An average of 77.4% (range: 64.5 – 88.3%) of the reads  
133 mapped uniquely, and no more than 5.3% mapped to multiple locations (Table S1). Across the 14

134 chromosomes, we found that 21,147 of 28,140 predicted genes were expressed (i.e. read counts per  
135 million [CPM] >1 in  $\geq 3$  samples).

136 To determine introgression boundaries in the STE and FER RSB<sub>7</sub> siblings, we called  
137 genome-wide single nucleotide polymorphisms (SNPs) and used them to genotype the samples. As  
138 expected due to our crossing scheme (see Figure 1), STE and FER siblings differ only in the region  
139 surrounding *hms1* on chromosome 6. Here, STE individuals contain a heterozygous IM62  
140 introgression that stretches across a 7 Mb region encoding 698 genes (508 of which are expressed in  
141 our dataset) while FER individuals are homozygous for the recurrent SF5 parent (Figure S1).  
142 Additionally, both FER and STE individuals carry a large heterozygous IM62 introgression that  
143 spans 23 Mb of chromosome 11 (90% of the physical distance; Figure S1), a region that encodes  
144 1064 genes (800 expressed in our dataset) and harbors a female meiotic drive locus (*D*) associated  
145 with strong transmission ratio distortion in SF5 x IM62 hybrids (Fishman & Willis, 2005; Fishman &  
146 Saunders, 2008).

147

#### 148 **Expression variation is driven by species, tissue, and fertility**

149 To visualize global gene expression patterns across the 24 samples in our dataset, we generated a  
150 multidimensional scaling (MDS) plot (Figure 2). Replicate samples from each of the eight genotype-  
151 by-tissue groups are highly similar to one another and form clusters that are generally separated from  
152 other groups (Figure 2). Along the y-axis, samples are primarily separated by species identity, with  
153 *M. guttatus* IM62 showing a distinct pattern of expression from *M. nasutus* SF5 and siblings from the  
154 RSB<sub>7</sub> introgression line (the latter carrying SF5 variation across most of their genetic backgrounds,  
155 see Figure S1). Of the 21,147 expressed genes, roughly 9% were significantly differentially  
156 expressed ( $-2 < \log_2 \text{fold-change} > 2$ ,  $\text{FDR} \leq 0.05$ ) between IM62 and SF5 in each tissue type  
157 (Figure S2). Previous work has shown substantial nucleotide divergence between *M. guttatus* and *M.*  
158 *nasutus* ( $d_S$  between IM62 and SF5 is 4.5%, see Brandvain et al. 2014), which presumably accounts  
159 for much of this expression variation.

160 Along the x-axis of the MDS plot, expression variation is largely determined by tissue type  
161 with clear separation between carpel and stamen samples (Figure 2). To investigate these differences  
162 more thoroughly, we compared patterns of tissue-biased gene expression between IM62 *M. guttatus*  
163 and SF5 *M. nasutus* (Figure 3). For a large number of genes, tissue-biased expression is conserved  
164 between species: 3393 genes (16%) show higher/lower expression in the same tissues in both IM62  
165 and SF5 (green points in Figure 3). On the other hand, a considerable number of genes (3214, 15.2%;  
166 blue and yellow dots in Figure 3) show tissue-biased expression in only one of the two species and a

167 handful (66, 0.4%; purple points in Figure 3) even show opposite patterns of tissue-biased expression  
168 (Figure 3).

169 A conspicuous exception to the species-tissue clustering pattern just described is the distinct  
170 group formed by the STE stamen samples (see red asterisks in Figure 2). We reasoned that this  
171 unique pattern of gene expression in STE stamens might be driven by the presence of the  
172 chromosome 6 introgression, which contains the hybrid male sterility-causing, IM62 *hms1* allele. To  
173 investigate this possibility, we compared gene expression profiles among STE, FER, and SF5 (Figure  
174 4). Indeed, the vast majority of differentially expressed genes were identified in comparisons of  
175 stamens with and without the chromosome 6 introgression (STE vs. FER and SF5: 311 upregulated,  
176 1881 downregulated). Moreover, differential expression in STE stamens was pervasive across the  
177 genome, affecting roughly equal proportions of genes in introgressed and background regions (Figure  
178 S3). Far fewer expression differences were found in comparisons of stamens distinguished only by  
179 the chromosome 11 introgression (Figure 4, FER vs. SF5: 9 upregulated, 0 downregulated).  
180 Additionally, relatively few differentially expressed genes were found in carpels, whether they  
181 carried the chromosome 6 introgression or not (across all comparisons: 27 upregulated, 0  
182 downregulated).

183

#### 184 **Gene expression in introgression lines is strongly affected by hybrid male sterility**

185 To examine patterns of transcriptional regulation associated with hybrid sterility, we plotted gene  
186 expression in FER (Figure 5) and STE (Figure 6) tissues relative to both parents. Because global  
187 patterns of relative expression are expected to differ between genes located in introgressions (which  
188 carry one IM62 allele and one SF5 allele) and genes located in background regions (which carry two  
189 SF5 alleles), we plotted these gene classes separately.

190 Patterns of relative expression in FER carpels, FER stamens and STE carpels (i.e. tissues  
191 unaffected by hybrid sterility) indicate that both *cis*-elements and *trans*-acting factors contribute to  
192 regulatory divergence. Among genes that were differentially expressed between the IM62 and SF5  
193 parents (hereafter “IM62-SF5 DEGs”; labeled “divergent” in Figures 5 & 6) and located in either of  
194 the two heterozygous introgressions, many showed intermediate levels of expression in FER carpels,  
195 FER stamens and STE carpels (green dots in Figures 5A-B and 6A, C), consistent with the additive  
196 effects of divergent *cis*-regulatory alleles. Additionally, a substantial number of IM62-SF5 DEGs in  
197 the heterozygous introgressions had SF5-like or IM62-like expression levels (dark blue and orange  
198 dots in Figures 5A-B and 6A, C), which might result from dominance of one *cis*-acting variant over  
199 the other. Consistent with this possibility, expression of heterozygous genes usually matched the



200 more highly expressed parent (note the bias toward positive values in Figures 5A-B and 6A, C).  
201 Dominance of a high-expression allele might be achieved via a *cis*-change that increases its own  
202 transcription (whereas dominance of a *cis*-acting, low-expression allele would have to *interfere* with  
203 expression from the high-expression allele). Effects of *trans*-acting factors on genes in the  
204 heterozygous introgressions are also apparent: many more IM62-SF5 DEGs exhibited SF5-like than  
205 IM62-like expression levels, suggesting a strong influence of *trans*-factors from the SF5 background  
206 (Figures 5A-B and 6A, C). Similarly, although the vast majority of IM62-SF5 DEGs in background  
207 regions were SF5-like due to their homozygosity for SF5 alleles (blue dots in Figures 5C-D and 6E),  
208 a handful showed IM62-like, intermediate, or transgressive expression (orange, green, and purple  
209 dots), consistent with *trans*-acting effects of IM62 alleles from the heterozygous introgressions.

210 Relative expression in STE stamens differed dramatically from all other samples, with a large  
211 number of genes showing transgressive expression (purple dots in Figure 6B, D, F). Additionally,  
212 STE stamens showed a marked increase in genes with IM62-like expression, including in  
213 background regions where genes are homozygous for SF5 alleles (orange dots in Figure 6B, D, F).  
214 Most of these IM62-like background genes were more highly expressed in the SF5 parent (orange  
215 dots on the right half of Figure 6F), suggesting they resembled IM62 because of underexpression in  
216 STE stamens. Similarly, most transgressive expression was caused by genes that were downregulated  
217 relative to both parents (Figure 6F, purple dots: note the bias toward negative values), including  
218 many that were not differentially expressed between IM62 and SF5 (light purple dots in Figure 6F).

219 The fact that transgressive (mostly downregulated) expression was almost entirely restricted  
220 to STE stamens suggests an association with the hybrid male sterility phenotype. Consistent with this  
221 idea, we observed an overrepresentation of stamen-biased genes among the 2192 genes that were  
222 differentially expressed in STE stamens compared to FER and SF5 stamens (see Figure 4): 1372  
223 (63%) were stamen-biased in both parents (74% were stamen-biased in SF5), whereas only 55  
224 (2.5%) were carpel-biased in both parents (5% were carpel-biased in SF5) (Figure S4). The vast  
225 majority (1358, 99%) of these 1372 stamen-biased genes were downregulated in STE stamens,  
226 whereas most (53, 96%) of the 55 carpel-biased genes were upregulated in this tissue. Moreover, we  
227 found overlapping GO term enrichment – mostly relating to pollen tube growth and function –  
228 among genes that were downregulated in STE stamens and those that were stamen-biased in the  
229 parents (Table S3). Taken together, these results suggest aberrant patterns of gene expression in STE  
230 stamens are a consequence of hybrid male sterility.

231

232 **Large effects of both *cis*- and *trans*-regulatory divergence between species**



233 Differences in gene expression between species are indicative of divergence in underlying regulatory  
234 machinery. By examining allele-specific expression in interspecific hybrids, regulatory divergence  
235 can be partitioned among contributing *cis* and *trans* components. Divergence in *cis*-regulatory factors  
236 will manifest as biased allele-specific expression in hybrid progeny. In contrast, divergence in *trans*-  
237 acting factors affects overall transcript abundance without disrupting allele-specific expression in  
238 hybrids. Consequently, a measure of *trans* divergence can be estimated by subtracting the *cis* effects  
239 (*i.e.* ratio of allele-specific transcript abundance in hybrids) from the *cis* and *trans* effects (*i.e.* ratio of  
240 transcript abundance between species).

241 To diagnose the pattern of regulatory divergence in *Mimulus*, we compared expression  
242 variation between SF5 and IM62 against allele-specific expression within STE and FER tissues  
243 across the heterozygous introgression regions within STE and FER tissues (Figure 7 and S5). Nearly  
244 half (31.1-44.5%) of the genes in the introgression regions exhibited both interspecific expression  
245 conservation and regulatory conservation (grey dots in Figure 7). Of the genes that were  
246 differentially expressed between SF5 and IM62, regulatory divergence was primarily categorized as  
247 *trans*-only (21-35, 7.2-11.5% of heterozygous genes; green dots in Figure 7), followed closely by *cis*-  
248 only (14-29, 4.8-9.1%; purple dots in Figure 7) and *cis x trans* (10-28, 3.4-7.3% of heterozygous  
249 genes; light blue dots in Figure 7). Among genes that were not differentially expressed between SF5  
250 and IM62, many (10-40, 3.7-9.7% of heterozygous genes) showed evidence of compensatory *cis*-  
251 *trans* evolution in FER and STE tissues (orange dots in Figure 7).

252

### 253 **Gene expression in *hms1* and *hms2* intervals points to candidate genes**

254 In addition to examining global patterns of gene expression, we wanted to investigate genes in the  
255 *hms1*- and *hms2*-mapped intervals to identify candidates for *Mimulus* hybrid sterility. Our  
256 expectation is that the causal genes for severe hybrid male sterility and partial hybrid female sterility  
257 will be expressed in stamens, and possibly, in carpels. Additionally, if the *hms1-hms2* incompatibility  
258 is mediated by expression changes, we might expect the causal genes to show differences in  
259 expression between species and/or between fertile and sterile introgression lines.

260 Of the 11 genes in the *hms1* interval, we were able to evaluate expression for only eight of  
261 them. Among these eight genes, six were expressed at moderate to high levels in stamens, with two  
262 (Migut.F01606 and Migut.F01607) showing stamen-specificity/bias (Table 1). One of these genes  
263 also showed expression differences between species and between introgression lines: Migut.F01606  
264 was highly expressed in SF5 and FER stamens and very lowly expressed (possibly off) in IM62 and  
265 STE stamens. One of them (Migut.F01612) shows copy number variation between species: this gene

266 and its highly similar paralog (Migut.F01618) are present in IM62 but absent in SF5. Because of its  
267 absence from the genome, expression is precluded in SF5 and FER samples. However, even in IM62  
268 and STE, expression is difficult to gauge because high sequence similarity between Migut.F01612  
269 and Migut.F01618 means that these transcripts did not pass our threshold for unique read mapping.  
270 Taken together, these results suggest that Migut.F01606 and Migut.F01612 are the most promising  
271 *hms1* candidates.

272         Of the five genes in the *hms2* interval, three were expressed at moderate to high levels in  
273 stamens, with two (Migut.M00295 and Migut.M00297) showing stamen-specificity/bias (Table 1).  
274 Two genes (Migut.M00296 and Migut.M00298) were carpel-biased with very little/no expression in  
275 stamens, making them unlikely candidates for the *hms2* causal gene. Intriguingly, Migut.M00297  
276 was much more lowly expressed in stamens from STE than from IM62, SF5, or FER. This pattern is  
277 precisely what is expected if the IM62 *hms1* allele (in the STE chromosome 6 introgression) directly  
278 affects expression of the causal *hms2* gene. From this analysis, then, Migut.M00297 emerges as a  
279 strong candidate for *hms2*.

280

## 281 **DISCUSSION**

282 Gene misregulation is a common feature of hybrids between closely related species, but its  
283 mechanisms and evolutionary significance are not always clear. Aberrant patterns of gene expression  
284 in sterile or inviable hybrids might be due to regulatory incompatibilities – which would implicate  
285 divergence in regulatory networks as a driver of reproductive isolation – or to the downstream effects  
286 of disrupted tissues. In this study, we took advantage of introgression hybrids between closely related  
287 *Mimulus* species to disentangle whether misexpression is a cause or consequence of hybrid sterility.  
288 Although we discovered substantial regulatory divergence between *M. guttatus* and *M. nasutus*,  
289 regulatory incompatibilities in hybrids were not pervasive. Instead, we found that massive  
290 downregulation of global transcript abundance was confined to the affected tissues (*i.e.*, stamens) of  
291 individuals carrying a sterility-causing introgression on chromosome 6, suggesting that male  
292 reproductive development is severely perturbed in sterile hybrids.

293         Despite the recentness of their split (~200 KYA, Brandvain *et al.*, 2014), *M. guttatus* and *M.*  
294 *nasutus* showed considerable variation in global gene expression, with nearly 10% of genes  
295 differentially expressed between species in stamens and/or carpels. This metric likely underestimates  
296 the amount of interspecific regulatory divergence in *Mimulus*, both because of our conservatively  
297 high threshold for significance ( $\log_2$  fold-change > 2, equivalent to a four-fold difference in  
298 expression) and because of *cis-trans* compensatory evolution, which can lead to changes in

299 underlying regulatory networks while conserving gene expression levels (True & Haag, 2001;  
300 Landry *et al.*, 2005). Indeed, eliminating the four-fold threshold cutoff (which we did when  
301 categorizing patterns of regulatory divergence), raised the percentage of differentially expressed  
302 genes between species to 50%. Extensive expression divergence over short evolutionary timescales  
303 has also been observed in animals (Rottschmidt & Harr, 2007; Renaut *et al.*, 2009; Coolon *et al.*,  
304 2014) and other plant systems (Fujimoto *et al.*, 2011; Combes *et al.*, 2015). However, we note that  
305 because nucleotide divergence between these *Mimulus* species barely exceeds diversity within *M.*  
306 *guttatus* ( $d_s = 4.94\%$  and  $\pi_{s-M. guttatus} = 4.91\%$ , Brandvain *et al.*, 2014), much of the observed  
307 expression variation between *M. guttatus* IM62 and *M. nasutus* SF5 might be segregating within  
308 species. We also observed more tissue-biased gene expression in *M. guttatus* than in *M. nasutus* (see  
309 Figure 3: IM62 has >50% more genes with carpel- and stamen-biased expression). An intriguing  
310 possibility is that this difference that might reflect divergence in reproductive traits associated with  
311 the species' distinct mating systems.

312 Our targeted look at gene expression in two heterozygous introgressions suggests that  
313 regulatory differences between *Mimulus* species are often due to divergence in *trans*-factors. This  
314 finding runs counter to the expectation that interspecific regulatory variation should be influenced  
315 primarily by changes to *cis*-regulatory sequences, which have fewer pleiotropic effects (Wray *et al.*  
316 2003, Wittkopp *et al.* 2008). However, it is in agreement with several recent studies showing that *cis*-  
317 changes do not always predominate between closely related species (McManus *et al.*, 2010;  
318 Meiklejohn *et al.*, 2014; Combes *et al.*, 2015; Guerrero *et al.*, 2016; Metzger *et al.*, 2017). When two  
319 lineages have split only recently, some of their regulatory differences might still be polymorphic  
320 within species, with purifying selection having had insufficient time to remove deleterious *trans*-  
321 regulatory variants. This argument, along with evidence that mutations in *trans*-factors arise more  
322 frequently (Landry *et al.*, 2007), might explain the higher contribution of *trans*-acting factors to  
323 regulatory variation observed within species (Wittkopp *et al.*, 2008; Emerson *et al.*, 2010), as well as  
324 between closely related species. In the case of the two *Mimulus* species studied here, an additional  
325 factor may influence the predominance of *trans*-regulatory divergence: deleterious mutations might  
326 be particularly likely to accumulate in *M. nasutus* because of its shift to self-fertilization. Indeed, this  
327 species shows genomic signatures that indicate a reduction in the efficacy of purifying selection  
328 (Brandvain *et al.*, 2014), an expected outcome of the lower effective population size and  
329 recombination rate that accompanies the evolution of selfing (Nordborg, 2000; Charlesworth &  
330 Wright, 2001).

331 In addition to *cis*- and *trans*-only regulatory divergence between these *Mimulus* species, our  
332 analyses of the two heterozygous introgressions uncovered evidence of *cis* x *trans* compensatory  
333 evolution. Interestingly, however, we found little indication that this process acts as a general driver  
334 of regulatory incompatibilities. Genes defined as compensatory were no more likely to be  
335 misexpressed (i.e., expressed outside the range of IM62 or SF5) than genes with conserved regulation  
336 (Figure S5). This result is somewhat surprising because compensatory changes within species are  
337 expected to cause mismatches in hybrids between *cis*- and *trans*-regulators, leading to aberrant gene  
338 expression and, potentially, hybrid dysfunction (Landry *et al.*, 2005). In support of this idea, several  
339 studies have shown that genes with *cis*- and *trans*-variants that act in opposing directions (i.e., *cis* x  
340 *trans*) are enriched among genes that are misexpressed in hybrids (Tirosh *et al.*, 2009; McManus *et*  
341 *al.*, 2010; Schaefer *et al.*, 2013; Mack *et al.*, 2016). On the other hand, it has been argued that *cis* x  
342 *trans* effects might often be inflated (Fraser, 2019), and, in some cases, the association is missing  
343 altogether (Bell *et al.*, 2013; Coolon *et al.*, 2014).

344 What is clear from our study is that widespread misexpression in *Mimulus* introgression  
345 hybrids is caused not by regulatory divergence, but by the hybrid sterility phenotype itself.  
346 Introgressing a 7 Mb genomic segment with the *hms1* incompatibility allele from *M. guttatus* into *M.*  
347 *nasutus* has profound effects on male fertility, with RSB<sub>7</sub> STE individuals producing only few pollen  
348 grains, nearly all of which are inviable. Coincident with this male sterility, RSB<sub>7</sub> STE stamens  
349 showed dramatic expression differences when compared to parental lines, with 7.2% of all genes  
350 misexpressed ( $N = 21,147$ ). In stark contrast, introgressing a genomic segment from chromosome 11,  
351 which is much larger in size (23 Mb) but does not carry any known hybrid incompatibility alleles,  
352 resulted in only a single misexpressed transcript in stamens (i.e., in RSB<sub>7</sub> FER individuals). The fact  
353 that neither introgression showed strong effects on expression in carpels suggests that partial hybrid  
354 female sterility either has few effects on gene regulation or manifests later in development.

355 Our study highlights the challenge of distinguishing the potential regulatory causes of hybrid  
356 incompatibilities from downstream effects. In subspecies of house mice, seven *trans*-eQTL  
357 colocalize with QTL for hybrid sterility (Turner *et al.*, 2014), providing strong evidence for a causal  
358 link between divergent regulatory alleles and the evolution of hybrid incompatibilities. In most other  
359 cases, however, this link has been difficult to establish because when hybrid misexpression is  
360 discovered, it is often confounded with the phenotypic effects of hybrid dysfunction, such as  
361 defective tissues and/or disrupted development (Ortiz-Barrientos *et al.*, 2007; Wei *et al.*, 2014). For  
362 example, when normally inviable F1 hybrid males between *Drosophila melanogaster* and *D.*  
363 *simulans* are rescued by a mutation in the hybrid incompatibility gene *Hmr*, gene expression in larvae

364 becomes much more similar to parents (Wei *et al.*, 2014). Like with the *hms1-hms2* incompatibility  
365 in *Mimulus*, this result suggests a large effect of the *Hmr* gene on genome-wide hybrid misexpression  
366 in *Drosophila*. A similar result was also seen in a previous study of *M. nasutus*-*M. guttatus* F2  
367 hybrids: the number of differentially expressed genes between parents and lethal F2 seedlings, which  
368 lack chlorophyll due to a two-locus hybrid incompatibility, is much higher than between parents and  
369 viable F2 seedlings (Zuellig & Sweigart, 2018). Taken together, these studies suggest that caution is  
370 needed when assigning a cause to hybrid gene misexpression. At the same time, it is important to  
371 note that our results do not rule out regulatory divergence as a cause of *Mimulus* hybrid  
372 incompatibilities in particular cases.

373 In addition to the main findings just discussed, our study has revealed a dramatic suppression  
374 of recombination in the RSB introgression population. Despite eight rounds of backcrossing to *M.*  
375 *nasutus*, the heterozygous introgressions on chromosomes 6 and 11 remain quite large (7 Mb and 23  
376 Mb, respectively). With uniform recombination rates and Mendelian transmission, RSB<sub>7</sub> individuals  
377 are expected to be heterozygous along ~0.2% of their genome, which equates to a maximum  
378 introgression size of ~0.625 Mb (*M. guttatus* genome ~312 Mb). Suppressed recombination rates on  
379 chromosome 6 were observed previously, in an earlier generation of the RSB population (Sweigart *et al.*  
380 *et al.*, 2006). At the time, we speculated that low recombination might be a direct cause of the *hms1-*  
381 *hms2* incompatibility – perhaps due to a meiotic defect. However, follow-up work performing  
382 testcrosses with F2 hybrids that carried either incompatible or parental genotypes at *hms1* and *hms2*  
383 showed no effect of the *hms1-hms2* incompatibility on recombination rates (data not shown).  
384 Additionally, we have observed a similar reduction in recombination in heterospecific introgressions  
385 when attempting to generate nearly isogenic lines using other *Mimulus* accessions that lack the *hms1-*  
386 *hms2* incompatibility. An alternative explanation for the suppressed recombination on chromosomes  
387 6 and 11 is that local sequence diversity affects recombination in *Mimulus*. In our crossing scheme,  
388 nucleotide diversity between chromosome homologs was much higher in heterospecific  
389 introgressions than in adjacent isogenic regions. Thus, if sequence diversity affects the likelihood of  
390 DNA double-strand breaks and/or crossover events, as it does in mice (Li *et al.*, 2018), we would  
391 expect much lower recombination in the heterozygous introgressions. Given the extraordinarily high  
392 nucleotide diversity within *M. guttatus* (Brandvain *et al.*, 2014; Puzey *et al.*, 2017), if this  
393 explanation is correct, we might expect extensive natural variation in recombination rates even  
394 within species.

395 Finally, we note that our study has shortened the list of likely candidate genes for causing the  
396 *hms1-hms2* incompatibility. Previously, we mapped *hms1* to an interval containing 11 annotated



397 genes with three strong functional candidates: *Migut.F01605*, *Migut.F01606*, and *Migut.F01612*  
398 (Sweigart & Flagel, 2015). The first two are tandem duplicates of *SKP1*-like genes, which form part  
399 of the SKP1–Cullin–F-box protein (SCF) E3 ubiquitin ligase complex that regulates many  
400 developmental processes including the cell cycle (Hellmann and Estelle 2002). Although we did not  
401 detect *Migut.F01605* expression in any sample (potentially calling into question its functionality),  
402 *Migut.F01606* remains a strong candidate. Expression of this gene was stamen-specific and much  
403 higher in *M. nasutus* SF5 and RSB<sub>7</sub> FER than in *M. guttatus* IM62 or RSB<sub>7</sub> STE. If *Migut.F01606* is  
404 causal for *hms1*, the fact that the normally expressed SF5 allele is off in heterozygous RSB<sub>7</sub> STE  
405 individuals suggests that the IM62 allele interferes with its expression. An alternative possibility is  
406 that reduced expression of *Migut.F01606* in RSB<sub>7</sub> STE is only one of the many downstream effects  
407 of the hybrid male sterility phenotype. *Migut.F01612*, an F-box gene, also remains a strong candidate  
408 for *hms1*. Although the RNAseq results provided little additional insight into the function of this  
409 gene (we did not detect expression in any sample), we have observed its expression in IM62 via RT-  
410 PCR (data not shown) and its absence from the SF5 genome is notable.

411 At *hms2*, expression patterns of *Migut.M00297* strengthen it as a candidate. This gene  
412 encodes the second-largest subunit (*RPB2*) of RNA Polymerase II – the multi-subunit enzyme  
413 responsible for mRNA transcription (Woychik & Hampsey, 2002; Hahn, 2004). In most flowering  
414 plant species, *RPB2* is a single copy gene. However, in the asterid clade, two distinct paralogs  
415 (*RPB2-i* and *RPB2-d*) are present, having been retained following an ancient duplication event  
416 (Oxelman *et al.*, 2004; Luo *et al.*, 2007). In all asterid species that have been investigated, the  
417 expression pattern of *RPB2-i* suggests that it is restricted to male reproductive structures (e.g. stamen  
418 and pollen) (Oxelman *et al.*, 2004; Luo *et al.*, 2007). In our experiment, expression of  
419 *Migut.M00297*, which encodes the *RPB2-i* paralog, was highly stamen-biased in both parents and in  
420 RSB<sub>7</sub> FER, but off in RSB<sub>7</sub> STE individuals. Although this is the pattern expected if the IM62 *hms1*  
421 allele (in the STE chromosome 6 introgression) directly affects the expression of the causal *hms2*  
422 gene, it might also arise as a byproduct of *hms1-hms2* sterility. Of course, an important consideration  
423 is that, for both *hms1* and *hms2*, the difference between compatible and incompatible alleles might  
424 have nothing to do with transcription. For each of these loci, then, additional approaches such as  
425 transformation experiments will be needed to identify the causal genes.

426

## 427 **METHODS**

### 428 **Plant lines and growth conditions**

429 This study focuses on *Mimulus guttatus* and *M. nasutus*, two closely related species that diverged  
430 roughly 200,000 years ago (Brandvain *et al.*, 2014). Previous work identified two nuclear  
431 incompatibility loci – *hms1* and *hms2* – that cause nearly complete male sterility and partial female  
432 sterility in a fraction of F<sub>2</sub> hybrids between an inbred line of *M. guttatus* from Iron Mountain, Oregon  
433 (IM62), and a naturally inbred *M. nasutus* line from Sherar’s Falls, Oregon (SF5). We generated an  
434 introgression population carrying incompatible (IM62) and compatible (SF5) *hms1* alleles in a  
435 common genetic background through multiple rounds of selection for pollen sterility and  
436 backcrossing to the recurrent SF5 parent (Sweigart *et al.* 2006). Briefly, *M. nasutus* SF5 and *M.*  
437 *guttatus* IM62 were intercrossed (with SF5 as the maternal parent) to create an F<sub>1</sub> hybrid that was  
438 backcrossed to SF5 (with the F<sub>1</sub> hybrid as the maternal parent). This crossing scheme resulted in a  
439 first-generation backcross (BC<sub>1</sub>) population that segregates four *hms1-hms2* genotypes (Figure 1).  
440 Next, a pollen sterile individual selected from the BC<sub>1</sub> population was backcrossed SF5, yielding the  
441 first generation of an introgression population dubbed recurrent selection with backcrossing (i.e.  
442 RSB<sub>1</sub>) (Sweigart *et al.*, 2006). This selective backcrossing scheme was repeated for six more  
443 generations to produce an RSB<sub>7</sub> population that segregates approximately 1:1 for two genotypes:  
444 pollen sterile (STE) individuals carrying a heterozygous introgression of the incompatible IM62  
445 allele at *hms1* and pollen fertile (FER) individuals homozygous for the compatible SF5 allele at  
446 *hms1*, both in a genetic background that is fixed for the incompatible SF5 allele at *hms2*. To identify  
447 FER and STE RSB<sub>7</sub> plants prior to flowering, individuals were genotyped at markers flanking *hms1*  
448 and *hms2*. To verify the fertility phenotypes, the first flower on each RSB<sub>7</sub> plant was allowed to self-  
449 pollinate. Within three to five days post-anthesis, fertilized fruits (on FER plants) begin to mature  
450 and plump, while the unfertilized fruits (on STE plants), remain immature and small, making it easy  
451 to differentiate the two phenotypic classes.

452 All plants were grown in a growth chamber at the University of Georgia. Seeds were sown  
453 into 2.5-inch pots containing Fafard 3B potting mix (Sun Gro Horticulture, Agawam, MA), stratified  
454 for 7 days at 4°C, then transferred to a growth chamber set to 22C day/16C night, 16-hour day  
455 length. Plants were bottom-watered daily and fertilized with bloom booster as needed.

456

#### 457 **Sample collection and transcriptome sequencing**

458 For this study, 24 whole transcriptome libraries were generated, consisting of three bioreps each of  
459 two tissue types (i.e. stamens and carpels) from four genotypes that vary at *hms1* and *hms2* (i.e. *M.*  
460 *guttatus* IM62, *M. nasutus* SF5, RSB<sub>7</sub> fertile [FER], and RSB<sub>7</sub> sterile [STE]) (Figure 1, and Table



461 S1). To collect enough tissue for each biorep, we carefully dissected 8-24 pre-anthesis floral buds  
462 and transferred the carpels and stamens to 1.5-mL microcentrifuge tubes that were partially  
463 submerged in liquid nitrogen (Table S1). For each sample, we extracted RNA using a QuickRNA  
464 Miniprep Kit (Zymo Research, Irvine, CA, USA) then assayed and measured RNA concentration  
465 using a Qubit RNA BR (Broad-Range) Assay Kit and a Qubit 2.0 Fluorometer (Thermo Fisher  
466 Scientific Inc., Waltham, MA, USA). Samples were shipped overnight on dry ice to the Duke Center  
467 for Genomic and Computational Biology (Durham, NC, USA), where the Sequencing and Genomic  
468 Technologies core checked RNA quality using an Bioanalyzer 2100 (Agilent Technologies, Santa  
469 Clara, CA, USA), constructed sequencing libraries using a KAPA Stranded mRNA-Seq Kit (F.  
470 Hoffmann-L Roche, Basel, Switzerland), and sequenced all 24 libraries on a single lane of HiSeq  
471 4000 (Illumina, Inc. San Diego, CA, USA), producing 50-base pair (bp) single-end reads (Table S1).  
472

### 473 ***M. nasutus* pseudoreference genome construction and transcriptome alignment**

474 An important consideration for genomic and transcriptomic analyses is potential mapping bias  
475 introduced when aligning reads from one species against a reference genome or transcriptome from  
476 another species (Degner *et al.*, 2009). The four genotypes in our dataset IM62, SF5, FER and STE,  
477 represent two pure species, *M. guttatus* and *M. nasutus*, as well as fertile (FER) and sterile (STE)  
478 siblings from a *M. nasutus*-*M. guttatus* backcrossed line. Previous work showed that interspecific  
479 nucleotide divergence between *M. guttatus* and *M. nasutus* is substantial ( $d_s = 4.94\%$ , see Brandvain  
480 *et al.* 2014). Therefore, aligning SF5, FER and STE – all of which are expected to carry SF5 alleles  
481 across >90% of their genomes – against the *M. guttatus* v2.0 reference genome (Hellsten *et al.*, 2013)  
482 is likely to cause mapping bias due to mismatch errors. Reads originating from *M. nasutus* may align  
483 incorrectly, non-uniquely, or not at all against the *M. guttatus* v2.0 reference genome. Further  
484 magnifying potential mapping bias issues, the *M. guttatus* v2.0 reference genome assembly is based  
485 on the IM62 accession and as such, IM62-derived reads are expected to align with near perfection.  
486 To ameliorate this issue, we first constructed a *M. nasutus* pseudoreference genome using publicly  
487 available SF5 whole genome sequence data, then aligned our SF5, FER and STE RNAseq reads  
488 against this.

489 Using the fastq-dump command from the NCBI toolkit, we retrieved the SF5 gDNA fastq  
490 files from the NCBI SRA database (SRR400478). To prepare these 75-bp paired-end sequences for  
491 alignment, we trimmed adapters and low-quality bases, then filtered out processed reads shorter than  
492 50 bp using Trimmomatic (Bolger *et al.*, 2014). We mapped the resulting 50-75-bp paired-end reads  
493 to the *M. guttatus* v2.0 reference genome using BWA-MEM (Li & Durbin, 2009; Li, 2013). To filter

494 the initial SF5 alignment, we eliminated optical and PCR duplicates using the MarkDuplicates tool  
495 from Picard (<http://broadinstitute.github.io/picard>) and removed reads with an alignment quality  
496 below Q30 using the view command from SAMtools (Li *et al.*, 2009). Next, we generated a set of  
497 high-quality SF5 single nucleotide polymorphisms (SNPs) to use in pseudoreference genome  
498 construction. First, we used GATK's HaplotypeCaller in GVCF mode followed by GATK's  
499 GenotypeGVCFs to identify phased SNP and insertion/deletion (indel) variants in the SF5 alignment  
500 (McKenna *et al.*, 2010; Poplin *et al.*, 2017). Next, we extracted biallelic SNPs using GATK's  
501 SelectVariants tool and filtered out sites with a mapping quality (MQ) below 40 or quality by depth  
502 (QD) below two using GATK's VariantFiltration. We used this filtered biallelic SNP VCF file to  
503 generate a *M. nasutus* pseudoreference using GATK's FastaAlternateReferenceMaker tool.

504 To increase mapping fidelity, we aligned our RNAseq reads against the appropriate  
505 reference: samples from the IM62 parent were aligned to the *M. guttatus* v2.0 reference genome and  
506 all other samples were aligned to the *M. nasutus* pseudoreference. Before mapping, we trimmed  
507 adapter sequences and low-quality bases, then filtered out processed reads shorter than 36 bp using  
508 Trimmomatic (Bolger *et al.*, 2014) (Table S1). The resulting 36-50-bp single-end RNAseq reads  
509 were aligned to the *M. guttatus* v2.0 reference genome with STAR in the multi-sample 2-pass  
510 mapping mode (Dobin *et al.*, 2013; Dobin & Gingeras, 2015). Transcriptome alignments were  
511 filtered similarly to genome alignments, with one additional step. We removed optical and PCR  
512 duplicates with the MarkDuplicates command from Picard (<http://broadinstitute.github.io/picard>),  
513 then used the SplitNCigarReads command from GATK to parse intron-spanning reads into exon  
514 segments and trim bases extending into intronic regions (McKenna *et al.*, 2010). Finally, we removed  
515 reads with an alignment quality below Q30 using the view command from SAMtools (Li *et al.*,  
516 2009).

517

### 518 **Variant calling and identification of introgression boundaries in RSB samples**

519 We used the GATK HaplotypeCaller tool in GVCF mode to call single nucleotide polymorphisms  
520 (SNPs) and insertions/deletions (indels) in the processed RNAseq alignment files. Variant calling  
521 from transcriptome data is dependent on transcript abundance, which can vary across genotypes and  
522 tissues. To increase our power to call variants in our 24 RNAseq samples, we simultaneously  
523 genotyped them alongside SF5 and IM62 DNaseq samples (SRR400478 and SRR052268) with the  
524 GATK GenotypeGVCF tool. Following joint genotyping, we performed a series of filtering steps  
525 using GATK and bcftools. First, sites with a mapping quality (MQ) score below 30 or quality by  
526 depth (QD) below two were filtered from the multi-sample variant call file (VCF). Then, for each

527 sample, VCF files containing only biallelic SNPs were extracted from the multi-sample VCF and  
528 filtered individually. Next, sites with a read depth below five were excluded from individual samples.  
529 Finally, sites were excluded from all samples if they were (i) heterozygous in the IM62 or SF5  
530 parental samples, (ii) homozygous reference in the SF5 samples (i.e. SF5 = IM62 reference), or (iii)  
531 homozygous non-reference in the IM62 samples (i.e. IM62  $\neq$  IM62 reference), as these were  
532 confounding or uninformative. After these filtering steps, we retained variant sites called in at least  
533 50% (12/24) of the RNAseq samples, resulting in 198,072 high-confidence SNPs. We extracted  
534 chromosomal location and genotype information at each SNP for all 24 RNAseq samples with  
535 bcftools query, which we used to identify introgression boundaries in the RSB samples.

536

### 537 **Differential gene expression analysis**

538 To estimate transcript abundance, reads were counted in the final processed transcriptome alignment  
539 files using HTSeq (Anders *et al.*, 2015). These raw read counts were then utilized to perform  
540 differential gene expression in edgeR (Robinson *et al.*, 2010). To restrict comparisons to genes  
541 expressed in at least one genotype-by-tissue group, we included only genes with at least one read  
542 count-per-million (CPM) in three or more of the 24 libraries. This filtering step removed 6,361  
543 genes, resulting in a set of 21,779 expressed genes. The calcNormFactors function was used  
544 normalize libraries for RNA composition with the default trimmed mean of M-values (TMM)  
545 method. To obtain a global view of gene expression across the 24 samples in our dataset, we used the  
546 plotMDS function in edgeR to generate a multidimensional scaling (MDS) plot, which is a type of  
547 unsupervised clustering plot. The distance between two points in an MDS plot represents the leading  
548 log-fold-change (i.e. largest absolute log-fold-change) between that sample pair. To test for  
549 differences in gene expression across the genotype-by-tissue groups, we conducted generalized linear  
550 model (GLM) analyses using a quasi-likelihood (QL) approach in edgeR. This method is flexible and  
551 permits any combination of sample comparisons to be made. First, we generated an experimental  
552 design matrix describing the eight genotype-by-tissue groups using the model.matrix function, then  
553 fitted it to a quasi-likelihood GLM framework using the glmQLFit function in edgeR. To identify  
554 genes for which the log<sub>2</sub> fold-change (log<sub>2</sub> FC) was significantly greater than two for a given  
555 comparison, we used the glmTreat function in edgeR, which performs threshold hypothesis testing on  
556 the GLM specified by the glmQLFit function. This is a rigorous statistical test that detects expression  
557 differences greater than the specified threshold value by evaluating both variability and magnitude of  
558 change in expression, then applies false discovery rate (FDR) *p*-value corrections. We categorized

559 genes as significantly differentially expressed between two genotype-by-tissue groups if the log<sub>2</sub> FC  
560 in transcript abundance was greater than two and the FDR-corrected *p*-value was less than or equal to  
561 0.05.

562

### 563 **Gene expression category assignment**

564 We categorized gene expression in the STE and FER RSB<sub>7</sub> siblings based on interspecific expression  
565 differences between IM62 and SF5, as well as differences between the RSB individual and its two  
566 parents (Table S2). This resulted in the following eight categories: (i) Conserved: the parents and  
567 RSB all have similar expression; (ii) SF5-like-conserved: RSB expression is similar to SF5 and  
568 significantly different than IM62. Expression does not differ between parents; (iii) SF5-like-  
569 divergent: RSB expression is similar to SF5 and significantly different from IM62. Expression differs  
570 significantly between parents; (iv) IM62-like-conserved: RSB expression is similar to IM62 and  
571 significantly different from SF5. Expression does not differ between parents; (v) IM62-like-  
572 divergent: RSB expression is similar to IM62 and significantly different from SF5. Parents differ  
573 significantly; (vi) Intermediate: RSB expression falls within the parental range. Expression differs  
574 significantly between parents; (vii) Transgressive-conserved: RSB expression is higher or lower than  
575 both parents. Expression does not differ between parents; (viii) Transgressive-divergent: RSB  
576 expression is higher or lower than both parents. Expression differs significantly between parents.

577

### 578 **Allele-specific expression analysis**

579 To measure allele-specific expression (ASE) within the heterozygous regions of FER and STE RSB<sub>7</sub>  
580 siblings, we used the phASER tool suite (Castel *et al.*, 2016). Only reads that overlap polymorphic  
581 sites are useful for ASE estimation. We quantified allele-specific counts across individual variant  
582 sites within the heterozygous regions of FER and STE samples using the phASER tool. We limited  
583 our ASE quantification to the 198,072 high-confidence SNP sites we previously identified (described  
584 above). As a filtering step, we removed allele-specific counts at sites with a read depth below five in  
585 individual samples. Next, we produced gene-level allele-specific counts at each heterozygous gene  
586 by summing counts across SNP sites located in the same gene with the phaser Gene AE tool. We  
587 utilized these gene-level allele-specific counts to perform ASE analyses in edgeR (Robinson *et al.*,  
588 2010). We restricted analyses to genes located in the chromosome 6 and chromosome 11  
589 introgressions with one or more allele-specific CPM in at least at least one genotype-by-tissue group.  
590 These filtering steps removed 391 of the 1308 genes expressed in the introgression regions, leaving  
591 917 for ASE analysis. To test for differences in ASE across FER and STE tissues, we fitted our

592 allele-specific count data to a GLM then performed likelihood ratio tests using the `glmFit` and  
593 `glmLRT` functions in `edgeR`. We categorized genes as having significant allelic imbalance within a  
594 genotype-by-tissue group if the  $\log_2$  transformed ratio of allele-specific transcript abundance was  
595 greater than zero and the FDR-corrected  $p$ -value was less than or equal to 0.1.

596

### 597 ***Cis-* and *trans*-regulatory divergence category assignment**

598 To estimate total (*cis* and *trans*) interspecific regulatory divergence in *Mimulus*, the  $\log_2$  transformed  
599 ratio of transcript abundance between SF5 and IM62 (pFC) was calculated across stamens and  
600 carpels. To estimate *cis*-regulatory divergence, the  $\log_2$  transformed ratio of allele-specific transcript  
601 abundance (aFC) was computed for each heterozygous gene in the chromosome 6 and chromosome  
602 11 introgression regions across FER and STE carpels and stamens. To estimate *trans* effects (*trans*)  
603 across FER and STE carpels and stamens, aFC was subtracted from the pFC in the corresponding  
604 tissue. To test for regulatory divergence, we analyzed pFC and aFC across FER and STE carpels and  
605 stamens for heterozygous genes in the introgression regions. For the purpose of regulatory  
606 divergence categorization, pFC tests were performed using `glmQLFTest()` function in `edgeR`,  
607 eliminating the four-fold expression threshold used in previous analyses. Significant difference in  
608 parental gene expression (*i.e.* significant pFC) was considered evidence of total (*cis* and *trans*)  
609 regulatory divergence. Similarly, significant imbalance in allelic ratio (*i.e.* significant aFC) in the  
610 introgression hybrids was considered evidence of *cis*-regulatory divergence. Genes with significant  
611 pFC or significant aFC were analyzed for significant *trans* effects by comparing pFC to aFC using  
612 *Student's t-test*. Significant differences ( $p$ -value  $\leq 0.1$ ) between these two ratios was considered  
613 evidence for *trans*-divergence. Using these results, we partitioned regulatory divergence across FER  
614 and STE carpels and stamens into the following seven categories: (i) *Cis* only: Significant pFC and  
615 aFC. Non-significant *trans*. The magnitude of aFC is greater than the magnitude of *trans*. pFC and  
616 aFC have the same sign (*i.e.* the species with higher expression also had the higher expressing *cis*-  
617 allele); (ii) *Trans* only: Significant pFC and *trans*. Non-significant aFC. The magnitude of *trans* is  
618 greater than the magnitude of aFC. pFC and *trans* have the same sign (*i.e.* the species with higher  
619 expression also had the higher expressing *trans*-allele); (iii) *Cis* + *trans*: Significant pFC, aFC, and  
620 *trans*. aFC and *trans* have the same sign (*i.e.* the species with higher expressing *cis*-allele also had  
621 the higher expressing *trans*-allele); (iv) *Cis* x *trans*: Significant pFC, aFC, and *trans*. aFC and *trans*  
622 have the opposite sign (*i.e.* the species with higher expressing *cis*-allele had the lower expressing  
623 *trans*-allele and vice versa); (v) Compensatory: Non-significant pFC. Significant aFC, and *trans*. aFC  
624 and *trans* have the opposite sign (*i.e.* the species with higher expressing *cis*-allele had the lower



625 expressing *trans*-allele and vice versa); (vi) Conserved: Non-significant pFC and aFC; (vii)  
626 Ambiguous: Any other combination of pFC, aFC, and *trans* (these have no clear interpretation).

627

## 628 Gene Ontology enrichment analysis

629 We performed Gene Ontology (GO) term analysis using the PlantRegMap online server  
630 (<http://plantregmap.cbi.pku.edu.cn/index.php>). To identify overrepresented GO terms within sets of  
631 differentially expressed genes, a significance threshold of a p-value  $\leq 0.01$  was chosen.

632

## 633 ACKNOWLEDGMENTS

634 The Sequencing and Genomics Technology core at the Duke Center for Genomic and Computational  
635 Biology prepared RNA sequencing libraries and performed whole transcriptome sequencing.  
636 Computational analyses associated with transcriptome alignment, variant detection, and total and  
637 allele-specific read quantification were conducted on the Sapelo/Sapelo2 high-performance  
638 computing cluster maintained by the Georgia Advance Computing Resource Center (GACRC) at  
639 UGA. We thank Casey Bergman, Kelly Dyer, and Dave Hall for valuable discussions. We also thank  
640 Samuel Mantel, Colin Meiklejohn, Gabrielle Sandstedt, and Matthew Zuellig for thoughtful  
641 comments on an earlier draft, which greatly improved the manuscript. This work was supported by  
642 National Science Foundation grant DEB-1350935 to ALS. Additionally, REK was supported by  
643 National Science Foundation grant IOS-PGRP-1546617.

644

## 645 REFERENCES

- 646 **Anders S, Pyl PT, Huber W. 2015.** HTSeq-A Python framework to work with high-throughput  
647 sequencing data. *Bioinformatics* **31**: 166–169.
- 648 **Barbash DA, Lorigan JG. 2007.** Lethality in *Drosophila melanogaster*/*Drosophila simulans* species  
649 hybrids is not associated with substantial transcriptional misregulation. *Journal of experimental*  
650 *zoology. Part B, Molecular and developmental evolution* **308B**: 74–84.
- 651 **Bell GD, Kane NC, Rieseberg LH, Adams KL. 2013.** RNA-seq analysis of allele-specific expression,  
652 hybrid effects, and regulatory divergence in hybrids compared with their parents from natural  
653 populations. *Genome Biol Evol* **5**: 1309–1323.
- 654 **Bolger AM, Lohse M, Usadel B. 2014.** Trimmomatic: A flexible trimmer for Illumina sequence data.  
655 *Bioinformatics* **30**: 2114–2120.
- 656 **Brandvain Y, Kenney AM, Flagel L, Coop G, Sweigart AL. 2014.** Speciation and introgression  
657 between *Mimulus nasutus* and *Mimulus guttatus*. *PLoS Genet* **10**: e1004410.
- 658 **Brill E, Kang L, Michalak K, Michalak P, Price DK. 2016.** Hybrid sterility and evolution in Hawaiian  
659 *Drosophila*: Differential gene and allele-specific expression analysis of backcross males. *Heredity*  
660 **117**: 100–108.
- 661 **Castel SE, Mohammadi P, Chung WK, Shen Y, Lappalainen T. 2016.** Rare variant phasing and

662 haplotypic expression from RNA sequencing with phASER. *Nat Commun* **7**: 12817.  
663 **Charlesworth D, Wright SI. 2001.** Breeding systems and genome evolution. *Curr Opin Genet Dev* **11**:  
664 685–690.  
665 **Combes MC, Hueber Y, Dereeper A, Rialle S, Herrera JC, Lashermes P. 2015.** Regulatory divergence  
666 between parental alleles determines gene expression patterns in hybrids. *Genome Biol Evol* **7**:  
667 1110–1121.  
668 **Coolon JD, Mcmanus CJ, Stevenson KR, Graveley BR, Wittkopp PJ. 2014.** Tempo and mode of  
669 regulatory evolution in *Drosophila*. *Genome Res* **24**: 797–808.  
670 **Degner JF, Marioni JC, Pai AA, Pickrell JK, Nkadori E, Gilad Y, Pritchard JK. 2009.** Effect of read-  
671 mapping biases on detecting allele-specific expression from RNA-sequencing data. *Bioinformatics*  
672 **25**: 3207–3212.  
673 **Dobin A, Davis CA, Schlesinger F, Drenkow J, Zaleski C, Jha S, Batut P, Chaisson M, Gingeras TR.**  
674 **2013.** STAR: ultrafast universal RNA-seq aligner. *Bioinformatics* **29**: 15–21.  
675 **Dobin A, Gingeras TR. 2015.** Mapping RNA-seq Reads with STAR. *Curr Protoc Bioinformatics* **51**: 11  
676 14 1-19.  
677 **Dobzhansky TH. 1937.** *Genetics and the origin of species*. New York: Columbia University Press.  
678 **Emerson JJ, Hsieh L-C, Sung H-M, Wang T-Y, Huang C-J, Lu HH-S, Lu M-YJ, Wu S-H, Li W-H. 2010.**  
679 Natural selection on *cis* and *trans* regulation in yeasts. *Genome Research* **20**: 826–836.  
680 **Fishman L, Saunders A. 2008.** Centromere-associated female meiotic drive entails male fitness costs  
681 in monkeyflowers. *Science* **322**: 1559–1561.  
682 **Fishman L, Willis JH. 2005.** A novel meiotic drive locus almost completely distorts segregation in  
683 *Mimulus* (monkeyflower) hybrids. *Genetics* **169**: 347–353.  
684 **Fraser HB. 2019.** Improving estimates of compensatory *cis-trans* regulatory divergence. *Trends*  
685 *Genet* **35**: 3–5.  
686 **Fujimoto R, Taylor JM, Sasaki T, Kawanabe T, Dennis ES. 2011.** Genome wide gene expression in  
687 artificially synthesized amphidiploids of *Arabidopsis*. *Plant Molecular Biology* **77**: 419–431.  
688 **Gilad Y, Oshlack A, Rifkin SA. 2006.** Natural selection on gene expression. *Trends Genet* **22**: 8–13.  
689 **Goncalves A, Leigh-Brown S, Thybert D, Stefflova K, Turro E, Flicek P, Brazma A, Odom DT,**  
690 **Marioni JC. 2012.** Extensive compensatory *cis-trans* regulation in the evolution of mouse gene  
691 expression. *Genome Research* **22**: 2376–2384.  
692 **Guerrero RF, Posto AL, Moyle LC, Hahn MW. 2016.** Genome-wide patterns of regulatory  
693 divergence revealed by introgression lines. *Evolution* **70**: 696–706.  
694 **Haerty W, Singh RS. 2006.** Gene regulation divergence is a major contributor to the evolution of  
695 Dobzhansky-Muller incompatibilities between species of *Drosophila*. *Molecular Biology and*  
696 *Evolution* **23**: 1707–1714.  
697 **Hahn S. 2004.** Structure and mechanism of the RNA polymerase II transcription machinery. *Nat*  
698 *Struct Mol Biol* **11**: 394–403.  
699 **Hellsten U, Wright KM, Jenkins J, Shu S, Yuan Y, Wessler SR, Schmutz J, Willis JH, Rokhsar DS.**  
700 **2013.** Fine-scale variation in meiotic recombination in *Mimulus* inferred from population shotgun  
701 sequencing. *PNAS* **110**: 19478–19482.  
702 **Kerwin RE, Sweigart AL. 2017.** Mechanisms of transmission ratio distortion at hybrid sterility loci  
703 within and between *Mimulus* species. *G3* **7**: 3719–3730.  
704 **Landry CR, Hartl DL, Ranz JM. 2007.** Genome clashes in hybrids: insights from gene expression.  
705 *Heredity* **99**: 483–493.  
706 **Landry CR, Wittkopp PJ, Taubes CH, Ranz JM, Clark AG, Hartl DL. 2005.** Compensatory *cis-trans*  
707 evolution and the dysregulation of gene expression in interspecific hybrids of *Drosophila*. *Genetics*



- 708 **171**: 1813–1822.
- 709 **Lemos B, Araripe LO, Fontanillas P, Hartl DL. 2008.** Dominance and the evolutionary accumulation  
710 of *cis*- and *trans*-effects on gene expression. *Proceedings of the National Academy of Sciences* **105**:  
711 14471–14476.
- 712 **Li H. 2013.** Aligning sequence reads, clone sequences and assembly contigs with BWA-MEM. *arXiv*  
713 **1303**: 3997v2.
- 714 **Li R, Bitoun E, Altemose N, Davies RW, Davies B, Myers SR. 2018.** A high-resolution map of non-  
715 crossover events reveals impacts of genetic diversity on mammalian meiotic recombination.  
716 *bioRxiv*: 1–49.
- 717 **Li H, Durbin R. 2009.** Fast and accurate short read alignment with Burrows-Wheeler transform.  
718 *Bioinformatics* **25**: 1754–1760.
- 719 **Li H, Handsaker B, Wysoker A, Fennell T, Ruan J, Homer N, Marth G, Abecasis G, Durbin R. 2009.**  
720 The Sequence Alignment/Map format and SAMtools. *Bioinformatics* **25**: 2078–2079.
- 721 **Luo J, Yoshikawa N, Hodson MC, Hall BD. 2007.** Duplication and paralog sorting of *RPB2* and *RPB1*  
722 genes in core eudicots. *Mol Phylogenet Evol* **44**: 850–862.
- 723 **Mack KL, Campbell P, Nachman MW. 2016.** Gene regulation and speciation in house mice. *Genome*  
724 *Res* **26**: 451–461.
- 725 **Mack KL, Nachman MW. 2017.** Gene regulation and speciation. *Trends in Genetics* **33**: 68–80.
- 726 **Malone JH, Chrzanowski TH, Michalak P. 2007.** Sterility and gene expression in hybrid males of  
727 *Xenopus laevis* and *X. muelleri*. *PLoS ONE* **2**.
- 728 **McKenna A, Hanna M, Banks E, Sivachenko A, Cibulskis K, Kernytsky A, Garimella K, Altshuler D,  
729 Gabriel S, Daly M, et al. 2010.** The Genome Analysis Toolkit: A MapReduce framework for analyzing  
730 next-generation DNA sequencing data. *Genome Res* **20**: 1297–1303.
- 731 **McManus CJ, Coolon JD, Duff MO, Eipper-Mains J, Graveley BR, Wittkopp PJ. 2010.** Regulatory  
732 divergence in *Drosophila* revealed by mRNA-seq. *Genome Research* **20**: 816–825.
- 733 **Meiklejohn CD, Coolon JD, Hartl DL, Wittkopp PJ. 2014.** The roles of *cis*- and *trans*-regulation in the  
734 evolution of regulatory incompatibilities and sexually dimorphic gene expression. *Genome Research*  
735 **24**: 84–95.
- 736 **Metzger BPH, Wittkopp PJ, Coolon JD. 2017.** Evolutionary dynamics of regulatory changes  
737 underlying gene expression divergence among *Saccharomyces* species. *Genome Biology and*  
738 *Evolution* **9**: 843–854.
- 739 **Michalak P, Noor MAF. 2003.** Genome-wide patterns of expression in *Drosophila* pure species and  
740 hybrid males. *Molecular Biology and Evolution* **20**: 1070–1076.
- 741 **Muller HJ. 1942.** Isolating mechanisms, evolution and temperature. In: Dobzhansky T, ed.  
742 Temperature, Evolution, Development. Lancaster, PA: Jaques Cattell Press, 71–125.
- 743 **Nordborg M. 2000.** Linkage disequilibrium, gene trees and selfing: an ancestral recombination.  
744 *Genetics* **154**: 923–9.
- 745 **Ortiz-Barrientos D, Counterman BA, Noor MAF. 2007.** Gene expression divergence and the origin  
746 of hybrid dysfunctions. *Genetica* **129**: 71–81.
- 747 **Oxelman B, Yoshikawa N, McConaughy BL, Luo J, Denton AL, Hall BD. 2004.** *RPB2* gene phylogeny  
748 in flowering plants, with particular emphasis on asterids. *Mol Phylogenet Evol* **32**: 462–479.
- 749 **Poplin R, Ruano-Rubio V, DePristo MA, Fennell TJ, Carneiro MO, Auwera GA Van der, Kling DE,  
750 Gauthier LD, Levy-Moonshine A, Roazen D, et al. 2017.** Scaling accurate genetic variant discovery  
751 to tens of thousands of samples. *bioRxiv*: 201178.
- 752 **Puzey JR, Willis JH, Kelly JK. 2017.** Population structure and local selection yield high genomic  
753 variation in *Mimulus guttatus*. *Mol Ecol* **26**: 519–535.

754 **Ranz JM, Namgyal K, Gibson G, Hartl DL. 2004.** Anomalies in the expression profile of interspecific  
755 hybrids of *Drosophila melanogaster* and *Drosophila simulans*. *Genome Research* **14**: 373–379.

756 **Renaut S, Nolte AW, Bernatchez L. 2009.** Gene expression divergence and hybrid misexpression  
757 between lake whitefish species pairs (*Coregonus* spp. Salmonidae). *Molecular Biology and Evolution*  
758 **26**: 925–936.

759 **Robinson MD, McCarthy DJ, Smyth GK. 2010.** edgeR: A Bioconductor package for differential  
760 expression analysis of digital gene expression data. *Bioinformatics* **26**: 139–140.

761 **Rottsccheidt R, Harr B. 2007.** Extensive additivity of gene expression differentiates subspecies of the  
762 house mouse. *Genetics* **177**: 1553–1567.

763 **Schaeffe B, Emerson JJ, Wang TY, Lu MYJ, Hsieh LC, Li WH. 2013.** Inheritance of gene expression  
764 level and selective constraints on *trans*- and *cis*-regulatory changes in yeast. *Molecular Biology and*  
765 *Evolution* **30**: 2121–2133.

766 **Sweigart AL, Fishman L, Willis JH. 2006.** A simple genetic incompatibility causes hybrid male  
767 sterility in *Mimulus*. *Genetics* **172**: 2465–2479.

768 **Sweigart AL, Flagel LE. 2015.** Evidence of natural selection acting on a polymorphic hybrid  
769 incompatibility locus in *Mimulus*. *Genetics* **199**: 543–554.

770 **Takahasi KR, Matsuo T, Takano-shimizu-kouno T. 2011.** Two types of *cis-trans* compensation in the  
771 evolution of transcriptional regulation. *PNAS* **108**.

772 **Tautz D. 2000.** Evolution of transcriptional regulation. *Current Opinion in Genetics & Development*:  
773 575–579.

774 **Tirosh I, Reikhav S, Levy AA, Barkai N. 2009.** A yeast hybrid provides insight into the evolution of  
775 gene expression regulation. *Science* **324**: 659–663.

776 **True JR, Haag ES. 2001.** Developmental system drift and flexibility in evolutionary trajectories.  
777 *Evolution and Development* **3**: 109–119.

778 **Turner LM, White MA, Tautz D, Payseur BA. 2014.** Genomic networks of hybrid sterility. *PLoS Genet*  
779 **10**: e1004162.

780 **Wei KH, Clark AG, Barbash DA. 2014.** Limited gene misregulation is exacerbated by allele-specific  
781 upregulation in lethal hybrids between *Drosophila melanogaster* and *Drosophila simulans*. *Mol Biol*  
782 *Evol* **31**: 1767–1778.

783 **Wittkopp PJ. 2013.** Evolution of gene expression. In: Losos JB, Baum DA, Futuyma DJ, Hoekstra HE,  
784 Lenski RE, Moore AJ, Peichel CL, Schluter D, Whitlock MC, eds. *The Princeton Guide to Evolution*.  
785 Princeton University Press, 1–853.

786 **Wittkopp PJ, Haerum BK, Clark AG. 2008.** Regulatory changes underlying expression differences  
787 within and between *Drosophila* species. *Nature Genetics* **40**: 346–350.

788 **Woychik NA, Hampsey M. 2002.** The RNA Polymerase II machinery : structure illuminates function.  
789 *Cell* **108**: 453–463.

790 **Wray GA, Hahn MW, Abouheif E, Balhoff JP, Pizer M, Rockman M V., Romano LA. 2003.** The  
791 evolution of transcriptional regulation in eukaryotes. *Molecular Biology and Evolution* **20**: 1377–  
792 1419.

793 **Zuellig MP, Sweigart AL. 2018.** Gene duplicates cause hybrid lethality between sympatric species of  
794 *Mimulus*. *PLoS Genet* **14**: e1007130.

795  
796  
797

**Table 1. Gene expression at *hms1* and *hms2*.** Table shows transcript abundance in fragments per kilobase per million reads sequenced (FPKM) for the 11 and five genes in the mapped regions of *hms1* and *hms2*, respectively.

| Sample | Tissue | <i>hms1</i>   |               |               |               |               |               |               |               |               |               |               | <i>hms2</i>   |               |               |               |               |
|--------|--------|---------------|---------------|---------------|---------------|---------------|---------------|---------------|---------------|---------------|---------------|---------------|---------------|---------------|---------------|---------------|---------------|
|        |        | Migut. F01605 | Migut. F01606 | Migut. F01607 | Migut. F01608 | Migut. F01609 | Migut. F01610 | Migut. F01611 | Migut. F01612 | Migut. F01613 | Migut. F01614 | Migut. F01615 | Migut. M00294 | Migut. M00295 | Migut. M00296 | Migut. M00297 | Migut. M00298 |
| IM62   |        | 0.0           | 0.2           | 19.5          | 0.2           | 2.2           | 0.0           | 0.4           | 0.0           | 1.0           | 0.0           | 1.9           | 7.4           | 28.1          | 0.6           | 14.5          | 0.0           |
| SF5    | stamen | 0.0           | 89.5          | 19.5          | 0.2           | 2.4           | 0.0           | 0.4           | 0.0           | 1.7           | 2.1           | 2.4           | 6.0           | 24.1          | 0.5           | 13.7          | 0.2           |
| FER    |        | 0.0           | 50.7          | 20.2          | 0.4           | 2.6           | 0.0           | 0.2           | 0.0           | 1.3           | 2.4           | 2.1           | 6.9           | 22.6          | 1.7           | 9.5           | 0.2           |
| STE    |        | 0.0           | 0.4           | 11.2          | 0.5           | 5.8           | 0.0           | 0.5           | 0.0           | 1.8           | 1.6           | 3.0           | 8.7           | 13.4          | 0.7           | 0.6           | 1.1           |
| IM62   |        | 0.0           | 0.0           | 6.9           | 3.2           | 2.5           | 0.0           | 1.2           | 0.0           | 2.1           | 0.1           | 2.9           | 4.6           | 8.0           | 34.0          | 2.0           | 1.6           |
| SF5    | carpel | 0.0           | 0.0           | 7.0           | 1.5           | 4.0           | 0.0           | 0.9           | 0.0           | 2.5           | 2.3           | 4.5           | 5.2           | 9.3           | 36.3          | 0.1           | 6.3           |
| FER    |        | 0.0           | 0.0           | 6.7           | 1.6           | 3.9           | 0.0           | 1.2           | 0.0           | 2.3           | 2.6           | 4.1           | 5.0           | 9.4           | 33.5          | 0.2           | 6.9           |
| STE    |        | 0.0           | 0.0           | 6.0           | 2.1           | 3.9           | 0.0           | 1.2           | 0.0           | 2.3           | 1.8           | 3.4           | 5.3           | 8.5           | 32.4          | 0.2           | 6.5           |

799

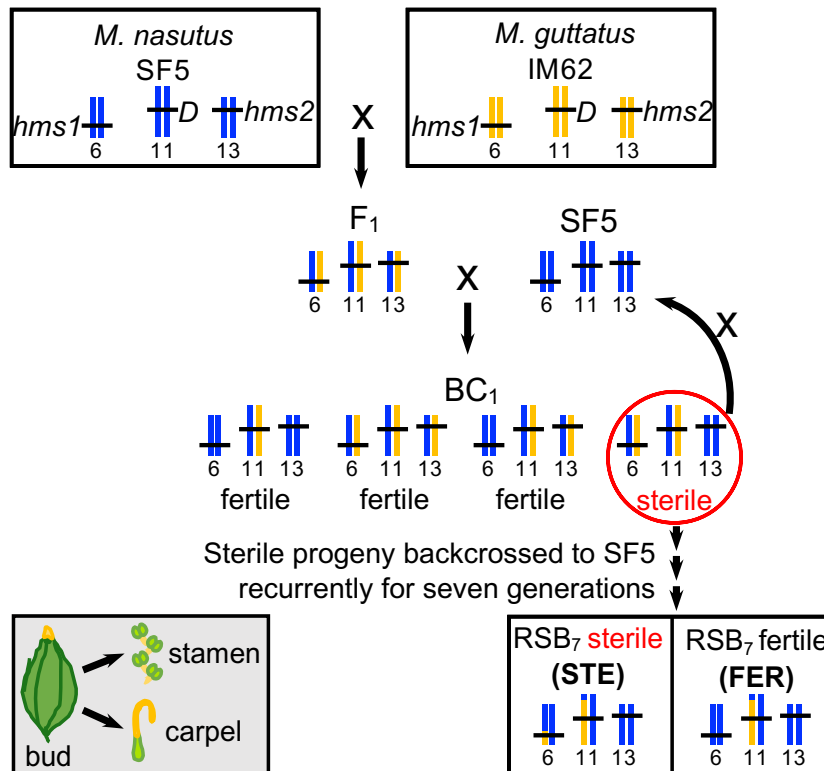

**Figure 1. Crossing scheme to generate recurrent selection with backcrossing (RSB) population.** First, an SF5 x IM62 F<sub>1</sub> was backcrossed to SF5, yielding a first generation backcross (BC<sub>1</sub>) population. A pollen sterile individual from the BC<sub>1</sub> population (red circle) was backcrossed to SF5, yielding a first generation introgression line (RSB<sub>1</sub>). The selective backcrossing was repeated for six more generations to produce an RSB<sub>7</sub> population. Roughly 50% of the RSB<sub>7</sub> siblings are pollen sterile because they carry an heterozygous introgression of the incompatible IM62 allele at *hms1* in an SF5 genomic background that is fixed for the incompatible allele at *hms2* while the other 50% are pollen fertile because they carry an SF5 allele at *hms1* in the same genomic background. Whole transcriptome sequencing was performed on three bioreps each of stamens and carpels (grey box) from four genotypes, *M. nasutus* SF5, *M. guttatus* IM62, RSB<sub>7</sub> fertile (FER), and RSB<sub>7</sub> sterile (STE) (black boxes), for a total of 24 samples representing eight tissue by genotype categories. To obtain sufficient tissue for sequence library prep, carpels or stamens dissected from four to eight young buds were pooled to form a single biorep.

800  
801

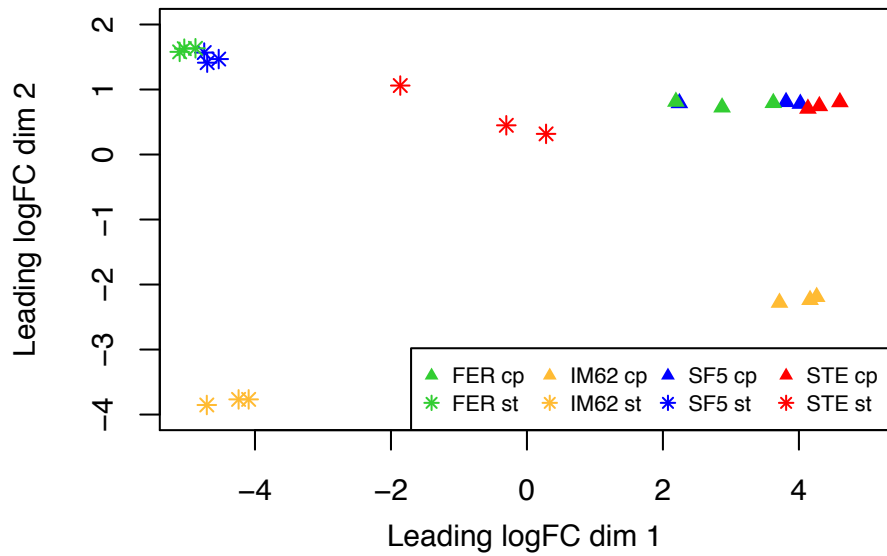

**Figure 2. Genome-wide expression pattern across samples.** Plot shows results from multidimensional scaling (MDS) analysis comparing gene expression across all 24 RNAseq samples. The colors and shapes represent the different genotype by tissue sample categories. FER cp = FER carpel, FER st = FER stamen, IM62 cp = IM62 carpel, IM62 st = IM62 stamen, SF5 cp = SF5 carpel, SF5 st = SF5 stamen, STE cp = STE carpel, STE st = STE stamen, logFC = log-fold-change

802  
803  
804

805

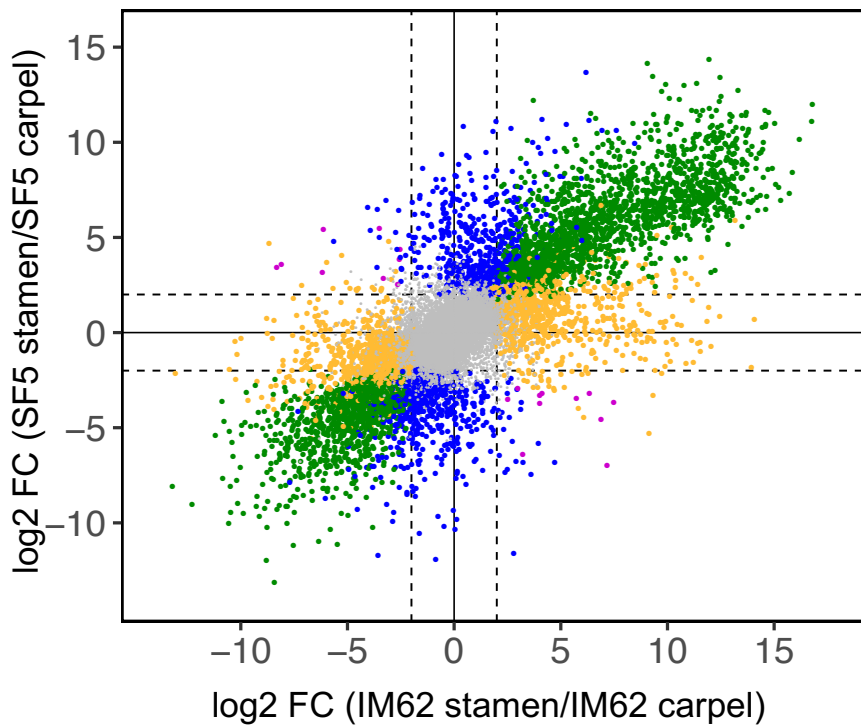

**Figure 3. Parental tissue-biased gene expression.**

Scatterplot shows relative transcript abundance (log<sub>2</sub> fold-change (FC)) between stamen and carpel tissues in the SF5 and IM62 parents. Of the 21,147 genes expressed in our dataset, 2038 (9.6%) were stamen-biased (log<sub>2</sub> FC > 2, FDR ≤ 0.05; top right quadrant green points) and 1355 (6.4%) were carpel-biased (log<sub>2</sub> FC < -2, FDR ≤ 0.05; bottom left quadrant green points), in both parents. An additional 598 (2.8%) and 686 (3.2%) genes were stamen- and carpel-biased, respectively, only in SF5 (blue points), while 922 (4.4%) and 1046 (4.9%) genes were stamen- and carpel-biased, respectively, only in IM62 (yellow points). A few genes exhibited opposing tissue-biased expression patterns in SF5 and IM62 (purple points): 9 (0.05%) were stamen-biased in SF5 and carpel-biased in IM62 while 11 (0.05%) were carpel-biased in SF5 and stamen-biased in IM62. The remaining 14,482 (68.5%) genes were evenly expressed between parental tissues (grey points).

806  
807

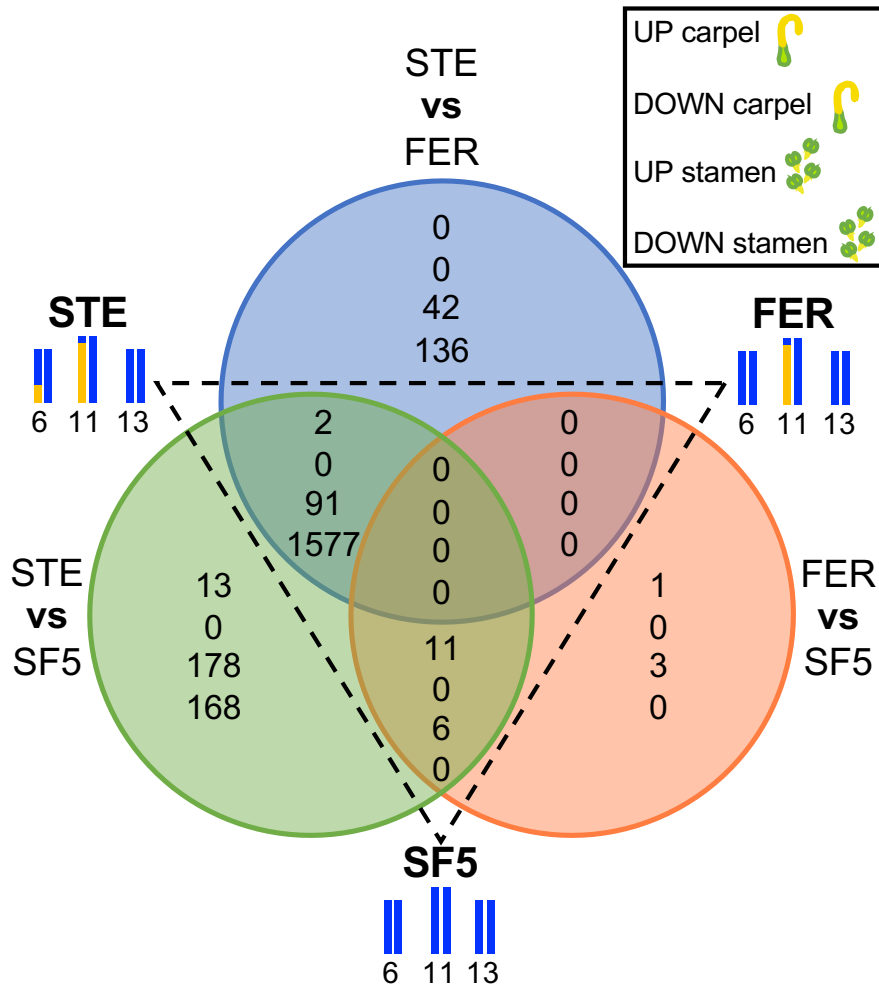

**Figure 4. Gene expression differences across sterile (STE), fertile (FER), and SF5 tissues.** Venn diagrams show counts of genes with significantly altered transcript abundance ( $-2 < \log_2 \text{fold-change} > 2$ ,  $\text{FDR} \leq 0.05$ ) in carpels and stamens across three pairwise comparisons: (i) RSB<sub>7</sub> sterile (STE) versus RSB<sub>7</sub> fertile (FER), (ii) STE versus the recurrent *M. nasutus* SF5 parent, and (iii) FER versus SF5.



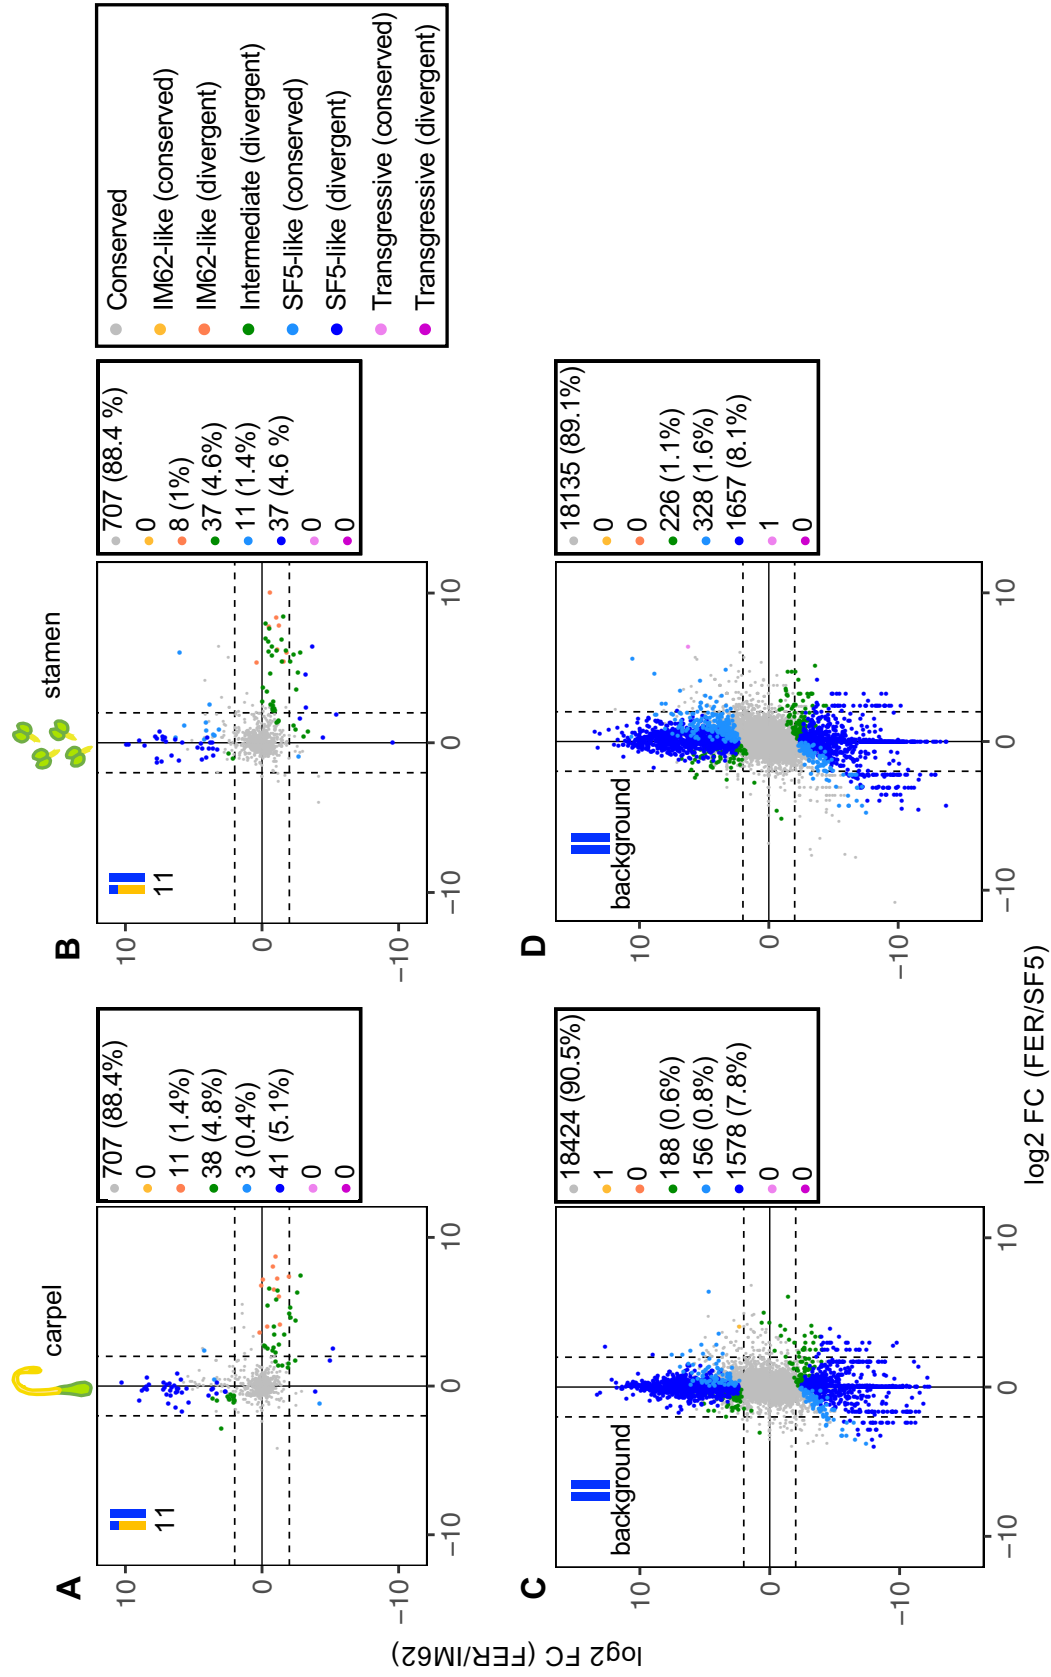

**Figure 5. Genomewide pattern of expression in fertile (FER) hybrids.** Plots show relative transcript abundance ( $\log_2$  fold-change (FC)) between FER and parental (A, C) carpels (B, D) and stamens for (A-B) heterozygous genes in the chromosome 11 introgression and (C-D) homozygous background genes. Genes are colored by expression class (see Table S2 for description).

812  
813  
814

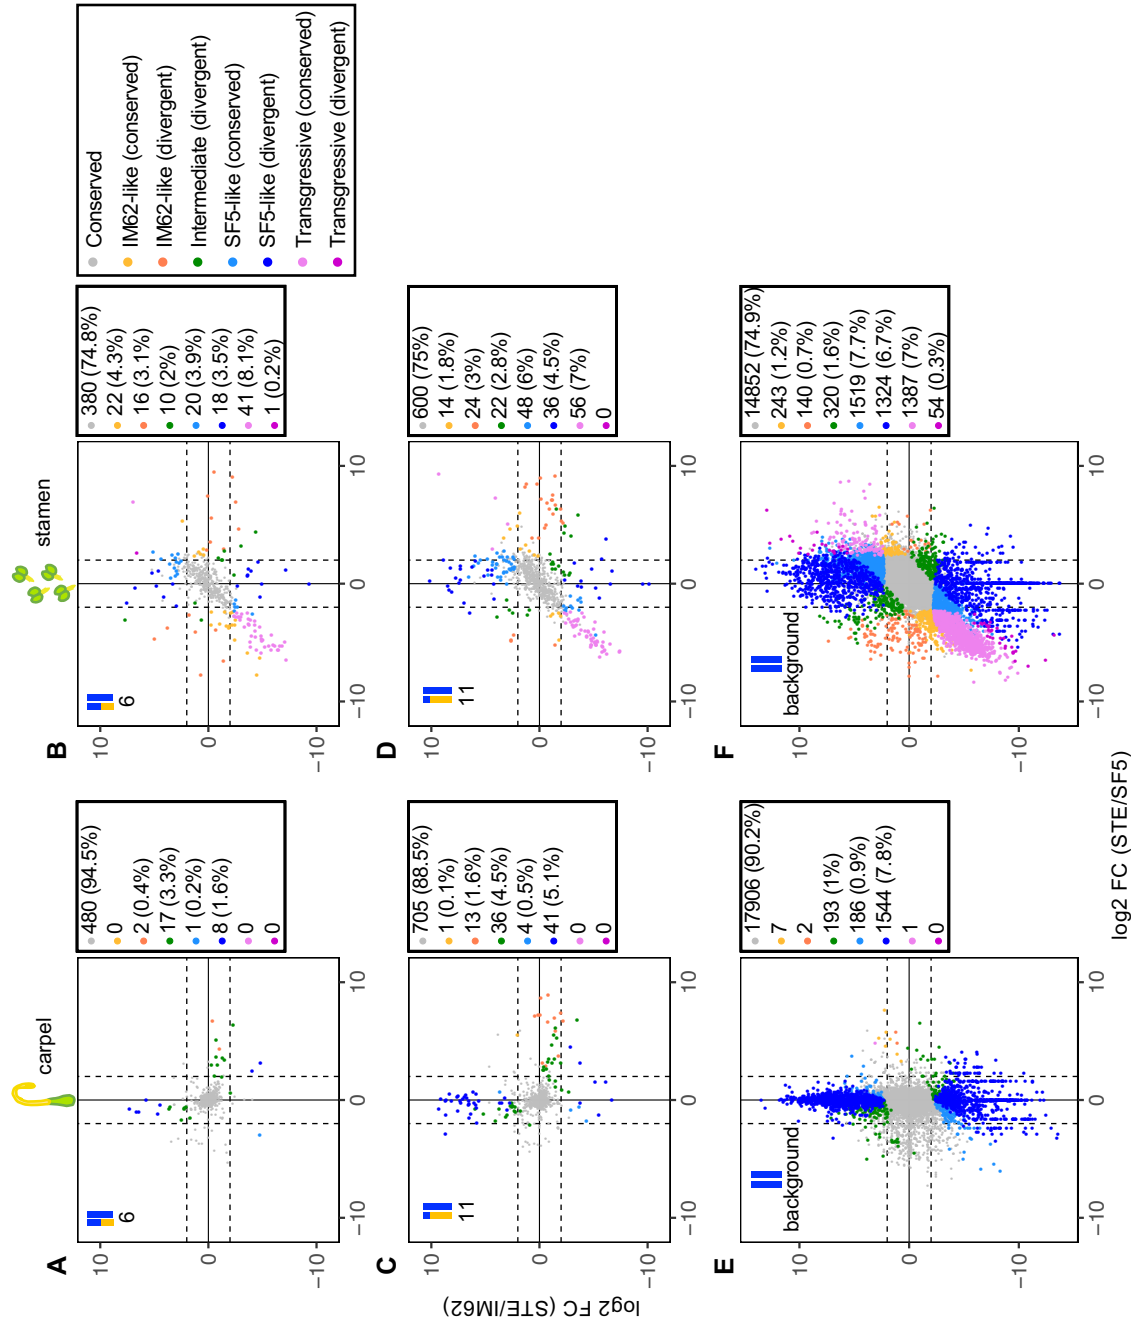

**Figure 6. Genotype-wide pattern of expression in sterile (STE) hybrids.** Plots show relative transcript abundance ( $\log_2$  fold-change (FC)) between STE and parental (A, C, E) carpels (A, C, E) and stamens for heterozygous genes in the (A-B) chromosome 6 introgression, (C-D) chromosome 11 introgression and (E-F) homozygous background genes. Genes are colored by expression class (see Table S2 for description).

815  
816

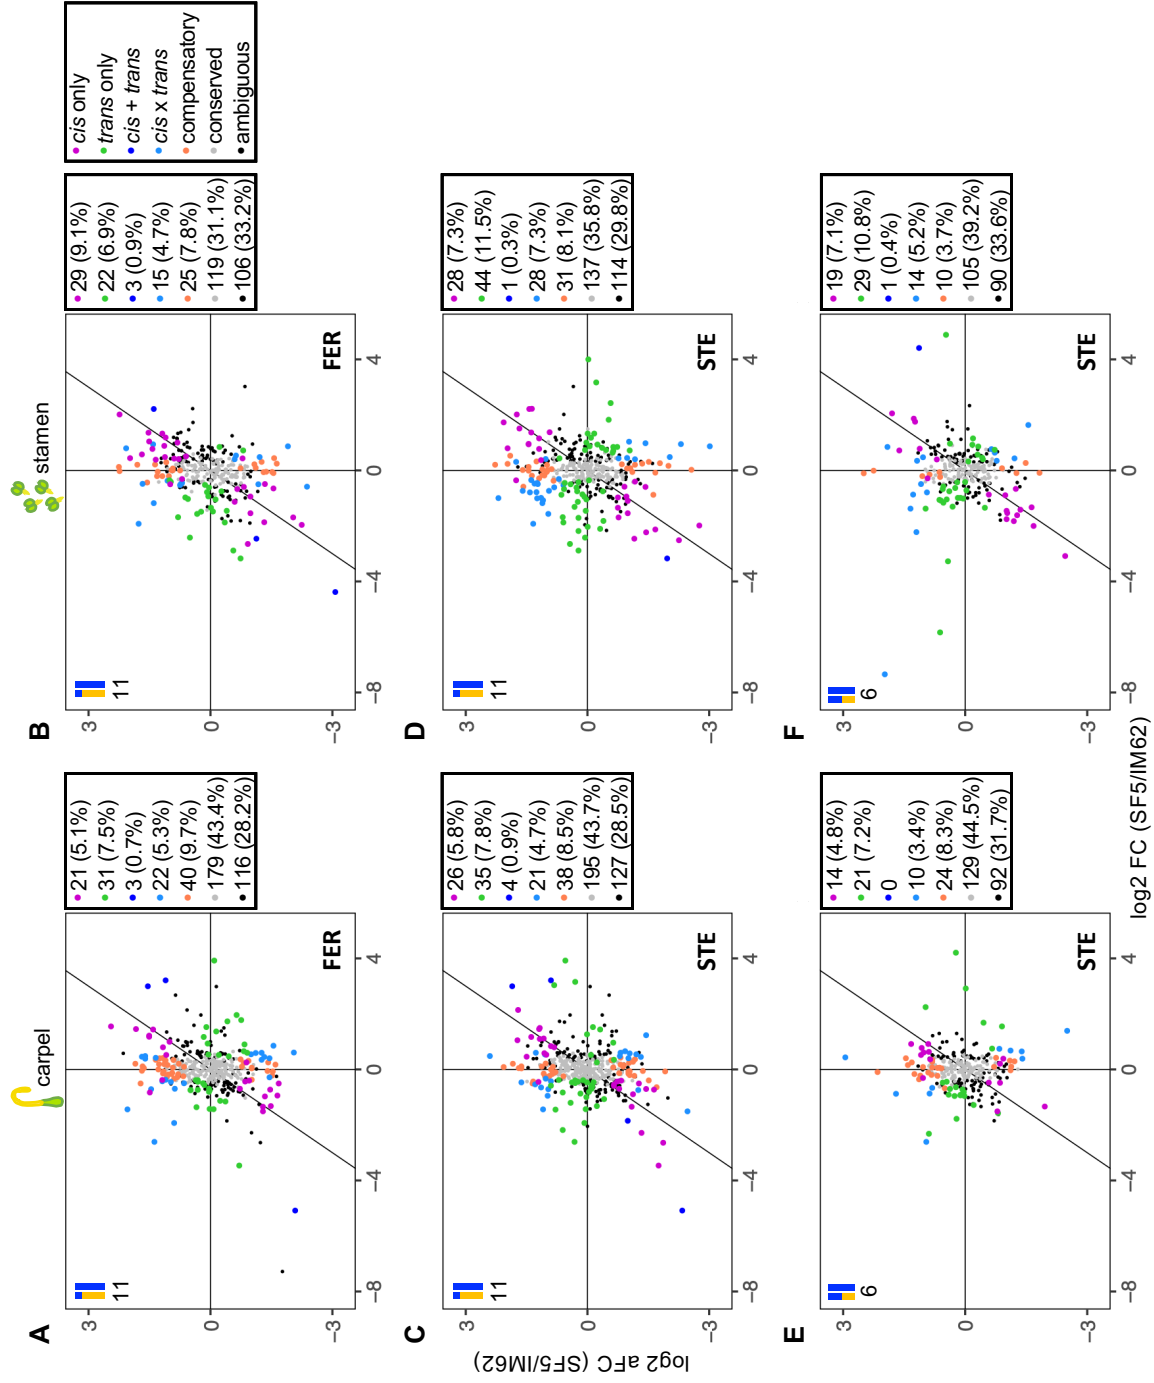

**Figure 7. Pattern of *cis*- and *trans*-regulatory differences in FER and STE introgression regions.** Plots show relative transcript abundance ( $\log_2$  fold-change (FC)) between the parents on the x-axis and relative allelic transcript abundance ( $\log_2$  allelic FC (aFC)) within heterozygous introgression regions on the y-axis. Genes are colored by regulatory category.
